# Supplementary material for: Variation of topological surface states of nodal line semimetal MgB2 resulting from adsorption of hydrogen, hydroxide, and water molecules
Source: Royal Society of Chemistry journal article supplement (doi:10.1039/d4cp02362e), 2024-01-01
Supplement: d4cp02362e1.pdf [file d4cp02362e1.pdf]

## Supplemental Materials for "Topological surface states variation of MgB<sub>2</sub> after absorbing hydrogen, hydroxide, and water"

Pangdong Zhu,<sup>1</sup> Kun Bu,<sup>2,\*</sup> Ruzhi Wang,<sup>1</sup> and Changhao Wang<sup>1,†</sup>

<sup>1</sup>Key Laboratory of Advanced Functional Materials,  
Education Ministry of China, Faculty of Materials and Manufacturing,  
Beijing University of Technology, Beijing 100124, China

<sup>2</sup>School of Physics and Optoelectronic Engineering,  
Shandong University of Technology, Zibo 255000, China

### I. Wannier tight-binding model for MgB<sub>2</sub>

In order to further explore the topological electronic properties of MgB<sub>2</sub>, we have constructed the tight-binding (TB) model based on the *s* and *p* orbitals of Mg and B using the maximally localized Wannier functions implemented in the Wannier90 code [1, 2]. Fig. S1(a) shows the calculated TB band structures comparing with band structures calculated using the density functional theory (DFT). The TB and DFT band structures show a good match, thus confirming the validity of our Wannier TB models. Fig. S1(b) shows the nodal lines derived from the TB band structures, the six equivalent nodal lines can be seen clearly.

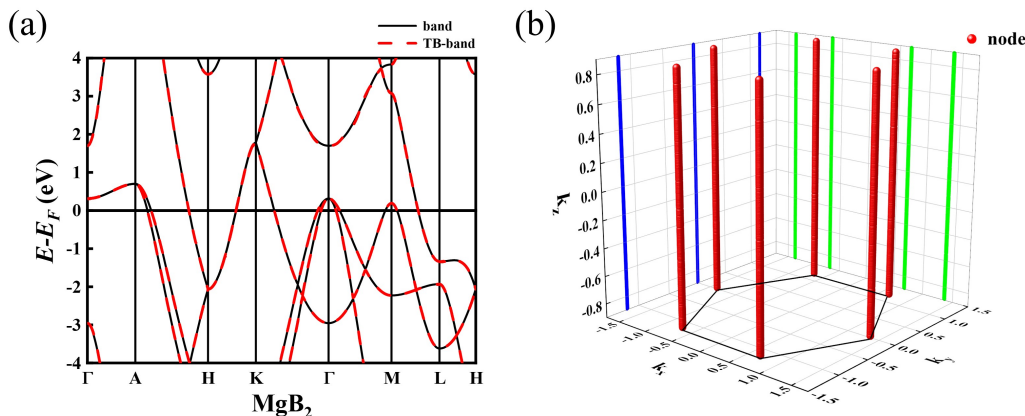

FIG. S1: (a) The tight-binding (TB) band structures in comparison with band structures derived from density functional theory (DFT). (b) The six equivalent nodal lines derived from the tight-binding band structures.

\*e-mail address: [bukun94@163.com](mailto:bukun94@163.com)

†e-mail address: [wangch33@bjut.edu.cn](mailto:wangch33@bjut.edu.cn)

## II. The effects of SOC on the energy band

Since Mg and B elements are light and SOC effects are weak, the influence of SOC was ignored in the study. As shown in FIG. S2, we compared the bulk phase band structure of  $\text{MgB}_2$  with and without SOC, and found that SOC had almost no effect on the band structure. Therefore, SOC was not considered in the subsequent study.

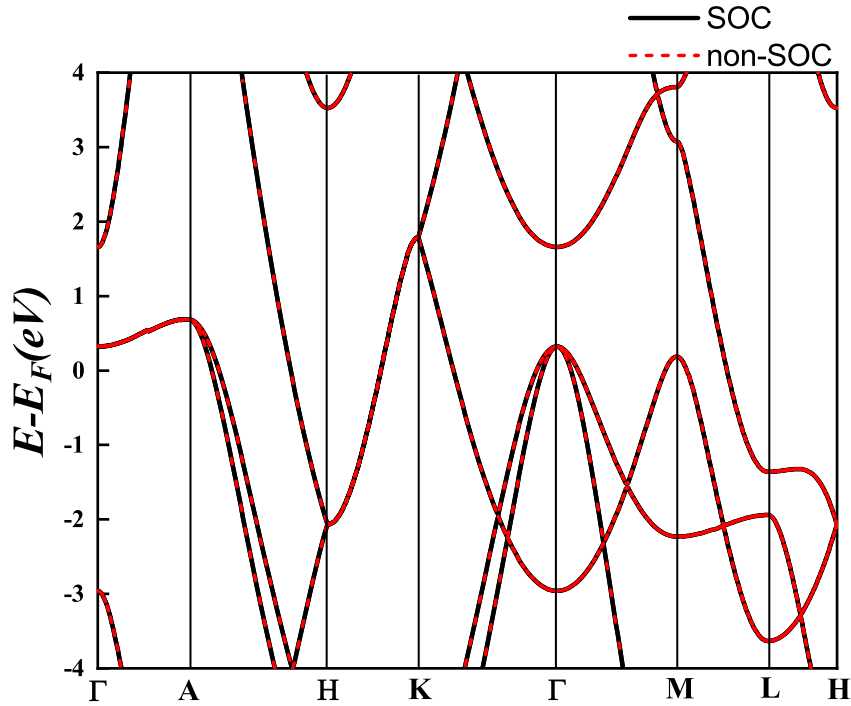

FIG. S2: The comparison of energy band calculation considering SOC and non-SOC for bulk  $\text{MgB}_2$  material is presented (The red dashed lines are band maps considering SOC and the black lines are non-SOC).

## III. Surface state analysis of multilayer structures

When building slab models, we tried to use 3-layer, 7-layer, 13-layer and 20-layer slab models to calculate the energy band structure, and found that the energy band structure reached stability after the 13th layer. Considering the saving of computing resources and the improvement of scientific research efficiency, we chose the 20-layer slab model for research. As shown in Figure S3 and S4, the slab band structures of the Mg/B end face of  $\text{MgB}_2$  are 3, 7, 13 and 20 layers.

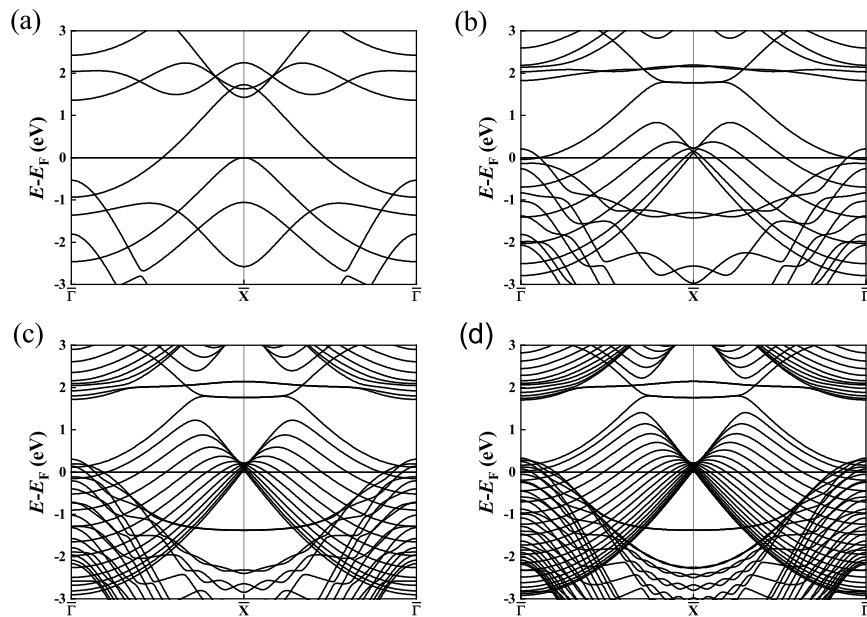

FIG. S3: Band structure of MgB<sub>2</sub> (010) Mg-terminated slab with (a) 3 layers; (b) 7 layers; (c) 13 layers; (d) 20 layers.

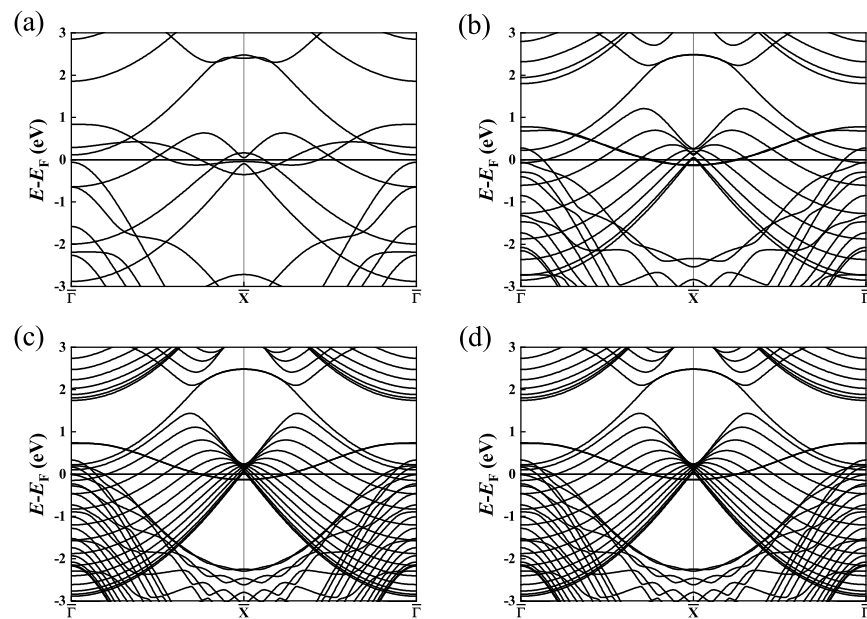

FIG. S4: Band structure of MgB<sub>2</sub> (010) B-terminated slab with (a) 3 layers; (b) 7 layers; (c) 13 layers; (d) 20 layers.

#### IV. The surface absorption Gibbs free energies at all possible absorption sites

TABLE S1: The surface absorption Gibbs free energy  $\Delta G_{H^*}$  at all possible absorption sites for Mg/B-terminated slab models. Thermal Corrections at 300K.

|        | slab (eV) |          | slab+H (eV) | H <sub>2</sub> (eV) | $\Delta E_{H^*}$ (eV) | Thermal Corrections (eV) | $\Delta G_H$ (eV) |
|--------|-----------|----------|-------------|---------------------|-----------------------|--------------------------|-------------------|
| 010-Mg | -288.18   | bridge-1 | -290.932    | -6.696              | 0.596                 | 0.132                    | 0.728             |
|        | -288.18   | bridge-2 | -290.819    | -6.696              | 0.709                 | 0.097                    | 0.806             |
|        | -288.18   | top      | -290.276    | -6.696              | 1.252                 | 0.084                    | 1.336             |
|        | -288.18   | hole     | -292.02     | -6.696              | -0.492                | 0.173                    | -0.319            |
| 010-B  | -296.524  | bridge-1 | -299.454    | -6.696              | 0.418                 | 0.1                      | 0.518             |
|        | -296.524  | bridge-2 | -299.893    | -6.696              | 0.418                 | 0.1                      | 0.518             |
|        | -296.524  | top      | -301.343    | -6.696              | -1.471                | 0.219                    | -1.252            |
|        | -296.524  | hole     | -298.923    | -6.696              | 0.949                 | 0.08                     | 1.029             |

TABLE S2: The surface absorption Gibbs free energy  $\Delta G_{OH}$  at all possible absorption sites for Mg/B-terminated slab models. Thermal Corrections at 300K.

|        | slab (eV) |          | slab+OH (eV) | OH (eV) | H <sub>2</sub> (eV) | H <sub>2</sub> O (eV) | $E_{OH}$ (eV) | Thermal Corrections (eV) | $\Delta G_{OH}$ (eV) |
|--------|-----------|----------|--------------|---------|---------------------|-----------------------|---------------|--------------------------|----------------------|
| 010-Mg | -290.316  | bridge-1 | -301.852     | -7.097  | -6.696              | -14.223               | -0.661        | 0.314                    | -0.347               |
|        | -290.316  | bridge-2 | -301.532     | -7.097  | -6.696              | -14.223               | -0.341        | 0.282                    | -0.059               |
|        | -290.316  | hole     | -301.248     | -7.097  | -6.696              | -14.223               | -0.057        | 0.221                    | 0.164                |
|        | -290.316  | top      | -300.598     | -7.097  | -6.696              | -14.223               | 0.593         | 0.284                    | 0.877                |
| 010-B  | -298.734  | bridge-1 | -308.725     | -7.097  | -6.696              | -14.223               | 0.884         | 0.280                    | 1.164                |
|        | -298.734  | bridge-2 | -310.064     | -7.097  | -6.696              | -14.223               | -0.455        | 0.294                    | -0.161               |
|        | -298.734  | hole     | -308.046     | -7.097  | -6.696              | -14.223               | 1.563         | 0.234                    | 1.797                |
|        | -298.734  | top      | -311.347     | -7.097  | -6.696              | -14.223               | -1.973        | 0.396                    | -1.442               |

TABLE S3: The surface absorption Gibbs free energy  $\Delta G_{H_2O}$  at all possible absorption sites for Mg/B-terminated slab models. Thermal Corrections at 300K.

|        | slab (eV) |          | slab+H <sub>2</sub> O (eV) | H <sub>2</sub> O (eV) | $E_{H_2O}$ (eV) | Thermal Corrections (eV) | $\Delta G_{H_2O}$ (eV) |
|--------|-----------|----------|----------------------------|-----------------------|-----------------|--------------------------|------------------------|
| 010-Mg | -290.316  | bridge-1 | -304.639                   | -14.223               | -0.1            | 0.54                     | 0.44                   |
|        | -290.316  | bridge-2 | -304.352                   | -14.223               | 0.187           | 0.542                    | 0.729                  |
|        | -290.316  | hole     | -304.336                   | -14.223               | 0.203           | 0.478                    | 0.681                  |
|        | -290.316  | top      | -304.74                    | -14.223               | -0.201          | 0.519                    | 0.318                  |
| 010-B  | -298.734  | bridge-1 | -312.728                   | -14.223               | 0.229           | 0.548                    | 0.777                  |
|        | -298.734  | bridge-2 | -312.672                   | -14.223               | 0.285           | 0.521                    | 0.806                  |
|        | -298.734  | hole     | -312.683                   | -14.223               | 0.274           | 0.536                    | 0.81                   |
|        | -298.734  | top      | -313.654                   | -14.223               | -0.697          | 0.527                    | -0.17                  |

In Table S1, S2, and S3, we have listed the surface absorption Gibbs free energies  $\Delta G_{H,OH,H_2O}$  for all possible absorption sites at the Mg/B-terminated slab models, respectively. For Mg-terminated slab models, the most favorable absorption site for H is the hole site, for OH is the bridge site, and for H<sub>2</sub>O is the top site; for B-terminated slab models, the most favorable absorption site for H is the top site, for OH is the top site, and for H<sub>2</sub>O is the top site.

### V. Fatband analysis for slab adsorbing H, OH, and H<sub>2</sub>O

In Fig. S5, S6, and S7, we show the fatband analysis for Mg/B-terminated slab adsorbing H, OH, and H<sub>2</sub>O, respectively. For Mg-terminated slab models, in all cases the topological surface state exists between two nodes; for B-terminated slab models, the topological surface state position changes when H and OH are adsorbed on the surface, while H<sub>2</sub>O adsorption remains between the two nodes.

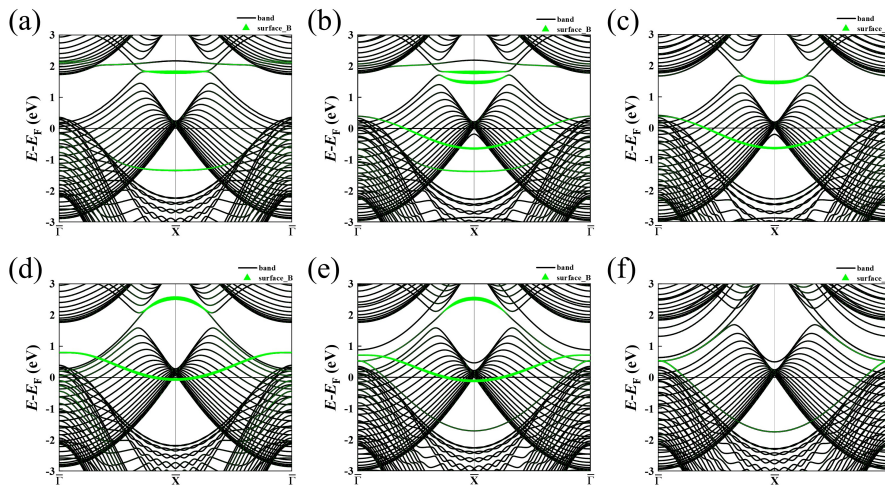

FIG. S5: (a) The (010) surface states given by the pristine Mg-terminated slab; (b) The (010) surface states given by the Mg-terminated slab adsorbing H on a single side; (c) The (010) surface states given by the Mg-terminated slab adsorbing H on both sides; (d) The (010) surface states given by the pristine B-terminated slab; (e) The (010) surface states given by the B-terminated slab adsorbing H on a single side; (f) The (010) surface states given by the B-terminated slab adsorbing H on both sides. The green triangles show the weight of the top layer of B atomic orbital states.

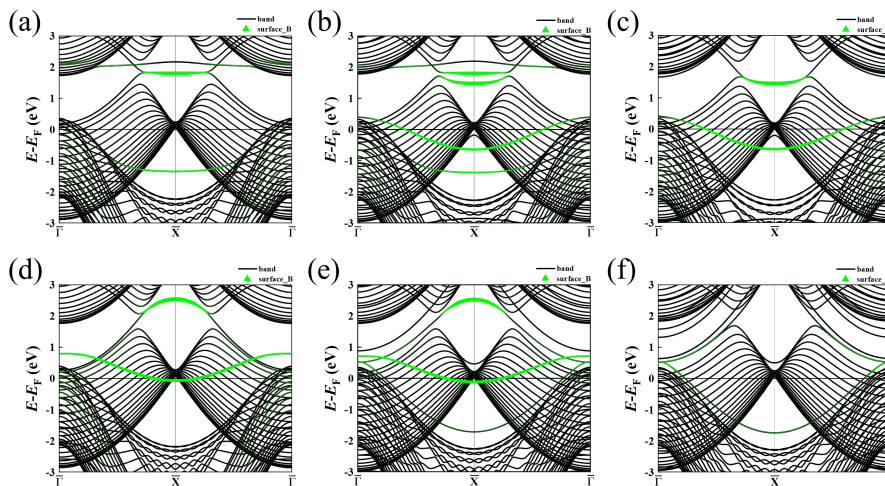

FIG. S6: (a) The (010) surface states given by the pristine Mg-terminated slab; (b) The (010) surface states given by the Mg-terminated slab adsorbing OH on a single side; (c) The (010) surface states given by the Mg-terminated slab adsorbing OH on both sides; (d) The (010) surface states given by the pristine B-terminated slab; (e) The (010) surface states given by the B-terminated slab adsorbing OH on a single side; (f) The (010) surface states given by the B-terminated slab adsorbing OH on both sides. The green triangles show the weight of the top layer of B atomic orbital states.

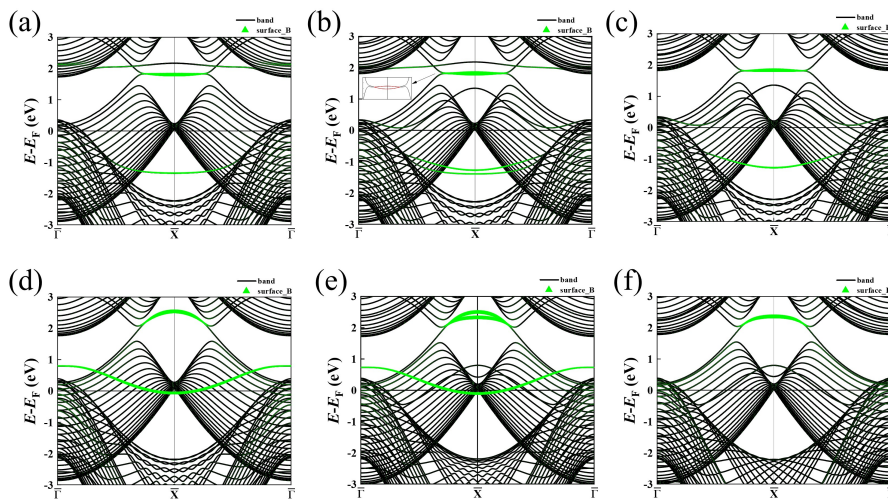

FIG. S7: (a) The (010) surface states given by the pristine Mg-terminated slab; (b) The (010) surface states given by the Mg-terminated slab adsorbing  $\text{H}_2\text{O}$  on a single side; (c) The (010) surface states given by the Mg-terminated slab adsorbing  $\text{H}_2\text{O}$  on both sides; (d) The (010) surface states given by the pristine B-terminated slab; (e) The (010) surface states given by the B-terminated slab adsorbing  $\text{H}_2\text{O}$  on a single side; (f) The (010) surface states given by the B-terminated slab adsorbing  $\text{H}_2\text{O}$  on both sides. The green triangles show the weight of the top layer of B atomic orbital states.

## VI. Differential charge density for most favorable adsorption sites

Our calculations show the most favorable adsorption site for H, OH, H<sub>2</sub>O is on the Mg/B-terminated slab of MgB<sub>2</sub>. Under this state, we provide the map of the charge density difference as shown in Fig. S8. We find sizable charge depletion on the (010) surface of MgB<sub>2</sub> (see the blue field), which has transferred to adatom (see the yellow field).

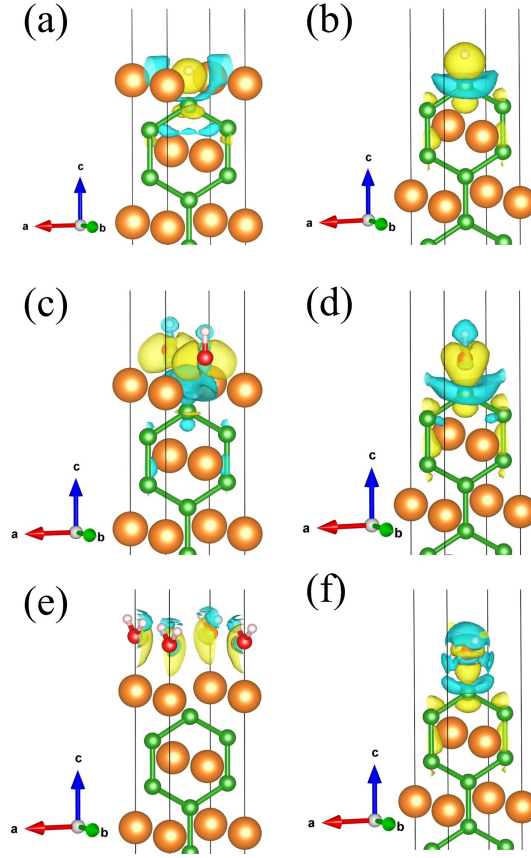

FIG. S8: (a) The Mg-terminated slab model after adding H on the hole site; (b) The B-terminated slab model after adding H on the top site; (c) The Mg-terminated slab model after adding OH on one bridge site; (d) The B-terminated slab model after adding OH on the top site; (e) The Mg-terminated slab model after adding H<sub>2</sub>O on the top site; (f) The B-terminated slab model after adding H<sub>2</sub>O on the top site. Meanwhile, we also show the band decomposed charge density of the surface bands at the projected  $\bar{X}$  point. Yellow and blue represent the electron depletion and accumulation, respectively. The isosurface is taken as 0.003 electrons/Å<sup>3</sup>.



### VII. Relationship between bond distance, $\Delta G$ and $\Delta E_{\text{TSS}}$

We further plotted  $\Delta G$  and  $\Delta E_{\text{TSS}}$ , as well as the bond distance of the adsorbate from the (010) surface of  $\text{MgB}_2$  versus  $\Delta E_{\text{TSS}}$ , as shown in Fig. S9. It can be seen that neither  $\Delta G$  nor bond distance has a good linear relationship with  $\Delta E_{\text{TSS}}$ .

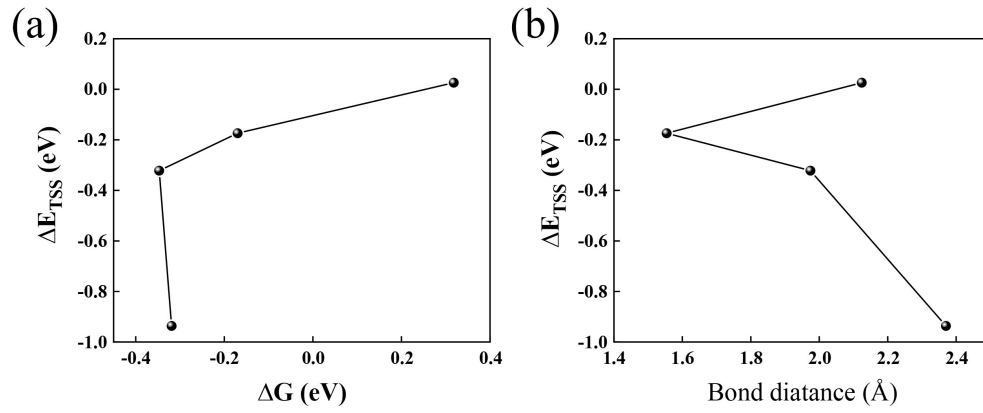

FIG. S9: (a) Topological surface state change and bond distance relationship; (b) Topological surface state change and  $\Delta G_{\text{H}^*, \text{OH}^*, \text{H}_2\text{O}^*}$  relationship.



- 
- [1] A. A. Mostofi, J. R. Yates, Y. S. Lee, I. Souza, D. Vanderbilt, and N. Marzari, *Wannier90: A tool for obtaining maximally-localised Wannier functions*, *Comput. Phys. Commun.* **178**, 685 (2008).
- [2] N. Marzari, A. A. Mostofi, J. R. Yates, I. Souza, and D. Vanderbilt, *Maximally localized Wannier functions: Theory and applications*, *Rev. Mod. Phys.* **84**, 1419 (2012).
